# Supplementary material for: A Cu2+-Selective Probe Based on Phenanthro-Imidazole Derivative
Source: MDPI journal article supplement (doi:10.3390/s17010035), 2016-12-24
Supplement: s1 [file s1]

# Supplementary Materials: A Cu<sup>2+</sup>-Selective Probe Based on Phenanthro-Imidazole Derivative

Dandan Cheng, Xingliang Liu, Hongzhi Yang, Tian Zhang, Aixia Han and Ling Zang

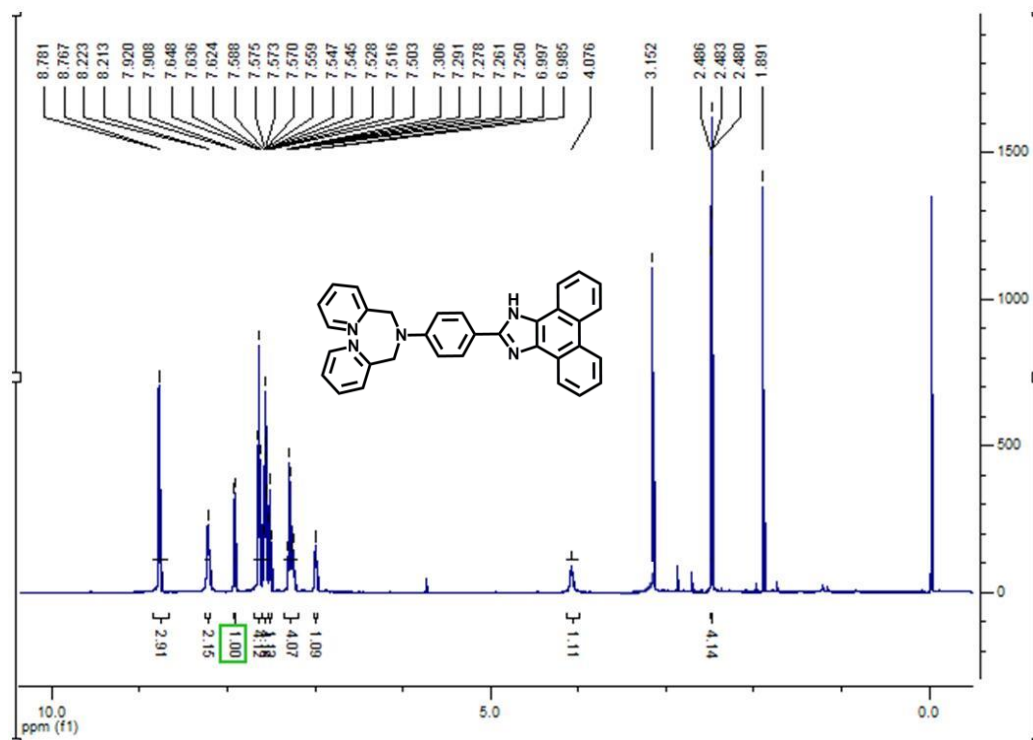

Figure S1. <sup>1</sup>H NMR (600 MHz) spectrum of compound 1 in d-DMSO.

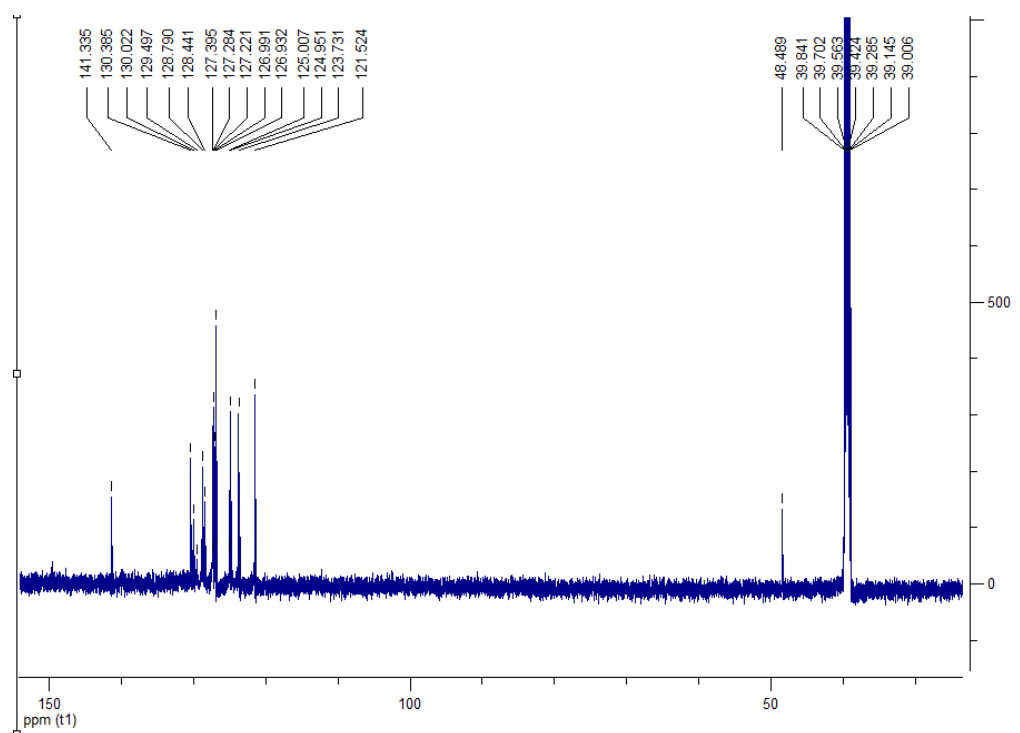

Figure S2. <sup>13</sup>C NMR (150 MHz) spectrum of compound 1 in d-DMSO.

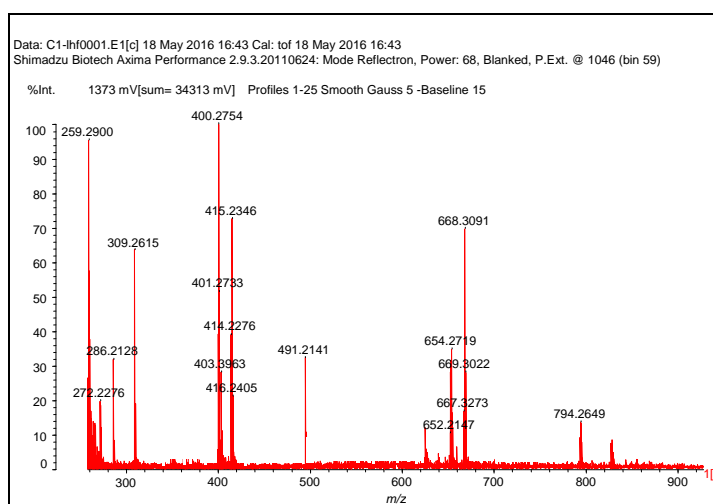

**Figure S3.** MALDI/TOF MS spectrum of compound 1.

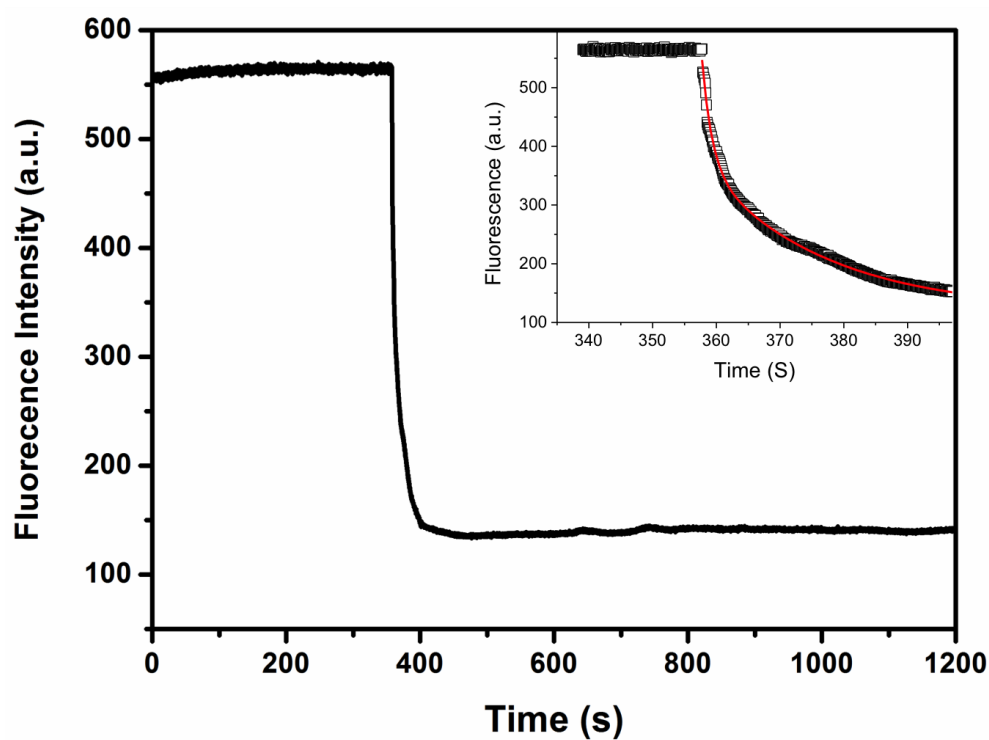

**Figure S4.** Fluorescence intensity measured at 387 nm for probe 1 in ethanol (10  $\mu$ M) as a function of time upon addition of  $\text{Cu}^{2+}$  (10  $\mu$ M). Exponential fitting of the fluorescence intensity decrease gives a response time of ca. 10 s.

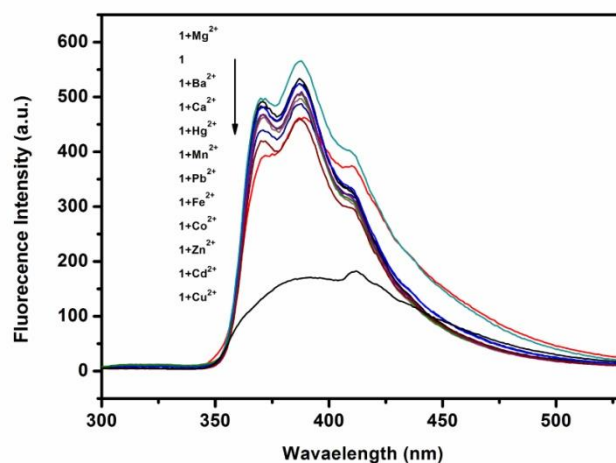

**Figure S5.** Fluorescence spectra of probe 1 in ethanol (10  $\mu$ M) in the absence and presence of various metal ions (10  $\mu$ M).

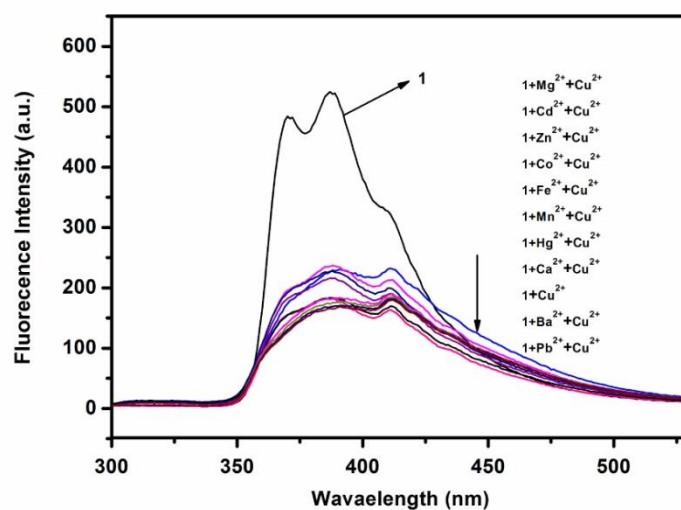

**Figure S6.** Fluorescence spectra of probe 1 in ethanol (10  $\mu$ M) in the absence and presence of various metal ions (10  $\mu$ M) plus 10  $\mu$ M of  $\text{Cu}^{2+}$ .

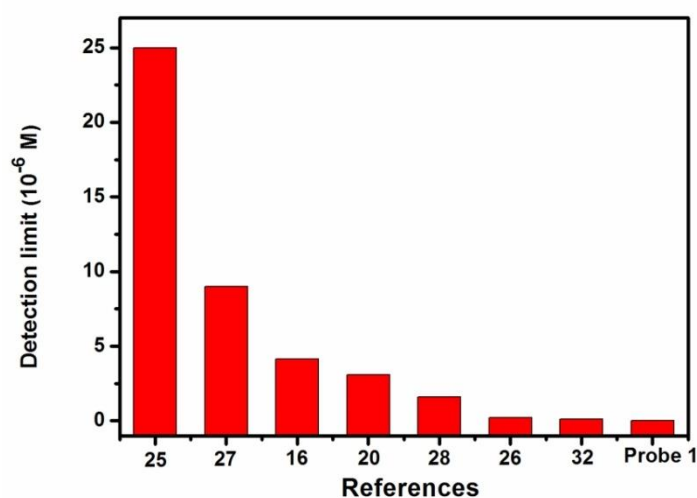

**Figure S7.** Comparison of the detection limit of Probe 1 with the literature reported detection limits of other sensors. Reference # marked in the horizontal axis are the same as cited in the main context.

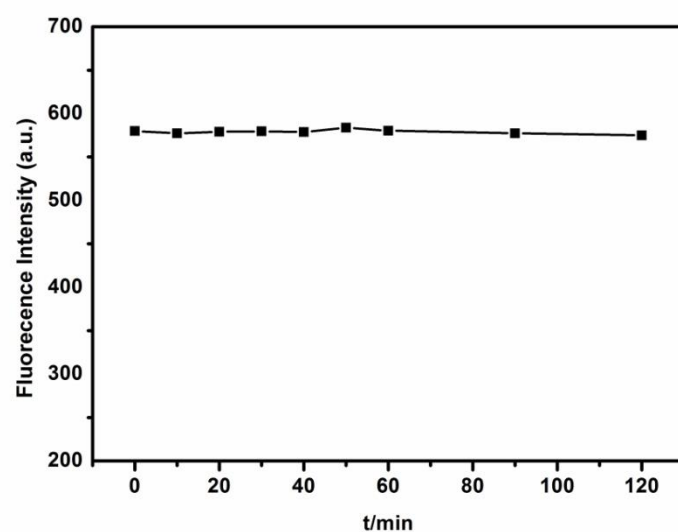

**Figure S8.** Fluorescence intensity measured at the main peak of probe 1 in ethanol (10  $\mu$ M) for nine consecutive times over 2 h.
